# Supplementary material for: Spermatogenesis Associated 4 Promotes Sertoli Cell Proliferation Modulated Negatively by Regulatory Factor X1
Source: PLoS One. 2013 Oct 11;8(10):e75933. doi: 10.1371/journal.pone.0075933 (PMC3795713; doi:10.1371/journal.pone.0075933)
Supplement: Table S1 — PCR primers used for constructing the reporter plasmids of the mouse Spata4 promoter. (DOC) [file pone.0075933.s003.doc]

Table S1 PCR primers used for constructing the reporter plasmids of the mouse Spata4 promoter

| **Primera** | **Sequence (5' to 3')b** |
| --- | --- |
| Forward primers |  |
| F-2819 | TAATTCACCAGTTCAGGGAG |
| F-2339 | ATACTTTTGGAGGAAGGACG |
| F-1824 | GAACTGCTTTGTGGAGTTAC |
| F-1425 | TCCTAAATCTTGGTTGGTGG |
| F-904 | TAGTAGCAAGCGCCTTAATC |
| F-373 | CTACTCTCATCCACCTC |
| F-131 | CGTTCATGGATCCAGAG |
| F-32  F-del-RFX1  F-del-SP1  F-del-HSF1  F-del-RREB1  F-del-AP1 | ATCGAGGCTTTAGCGTC  ATAAAGCACCATGGCTGCCGCCGGCC  TTCGACGCTAAAGCCTCGATTCCAG  ACAGTGAAAATTGTTTTTTTTTTTT  ACAATT TTCACTGTCTTCTAGAGC  ATAAGACATATATCACTGGACAAAGAG |
| Reverse primers |  |
| R+128  R-del-RFX1  R-del-SP1  R-del-HSF1  R-del-RREB1  R-del-AP1 | CGTCTTGGATGATTCTGC  ATCAGCTGGGGGCTGATAAGGTCTGC  CTTCGGCCTCCAAGAAGGCTCTGTG  CATTTCTCTTCAAAATTCTTTATTGAAC  GGGGGGAGGTGGATGAGAGTAGGAGATA  TAATGACTGTTTTTTAAGAAACTGTC |

aThe number indicates the position of the 5' terminus of the primer relative to the first transcription start site of mouse Spata4.

bThe primer sequences do not include the restriction sites and the protection bases.
